# Supplementary material
Source: PubMed Central journal article supplement (PMC2856279)

### **Supplementary Figure 1: Positive control for $\beta$ -N-acetylhexoseaminidase activity**

The commercially available hybrid type glycan with bisecting  $\beta$ -GlcNAc (MC0941; Dextra Laboratories Ltd.) was used to test the activity of  $\beta$ -N-acetylhexoseaminidase. Digestion with  $\alpha$ -Mannosidase and  $\beta$ -N-acetylhexoseaminidase was done as described in Experimental procedures. Samples were analyzed using MALDI-MS. Peaks at 729.5 and 1784.1 are explained by the cartoon representation next to it. Peaks at 703.6, 747.7, 939.8 and 1200.1 are unknown, but do neither correspond to masses of trimming intermediates nor show glycan characteristic MS/MS fragmentation.  $\beta$ -GlcNAc: N-acetylglucosamine linked in  $\beta$ ; Man: mannose; 2-AB: 2-aminobenzamide.

Supplementary Figure 1

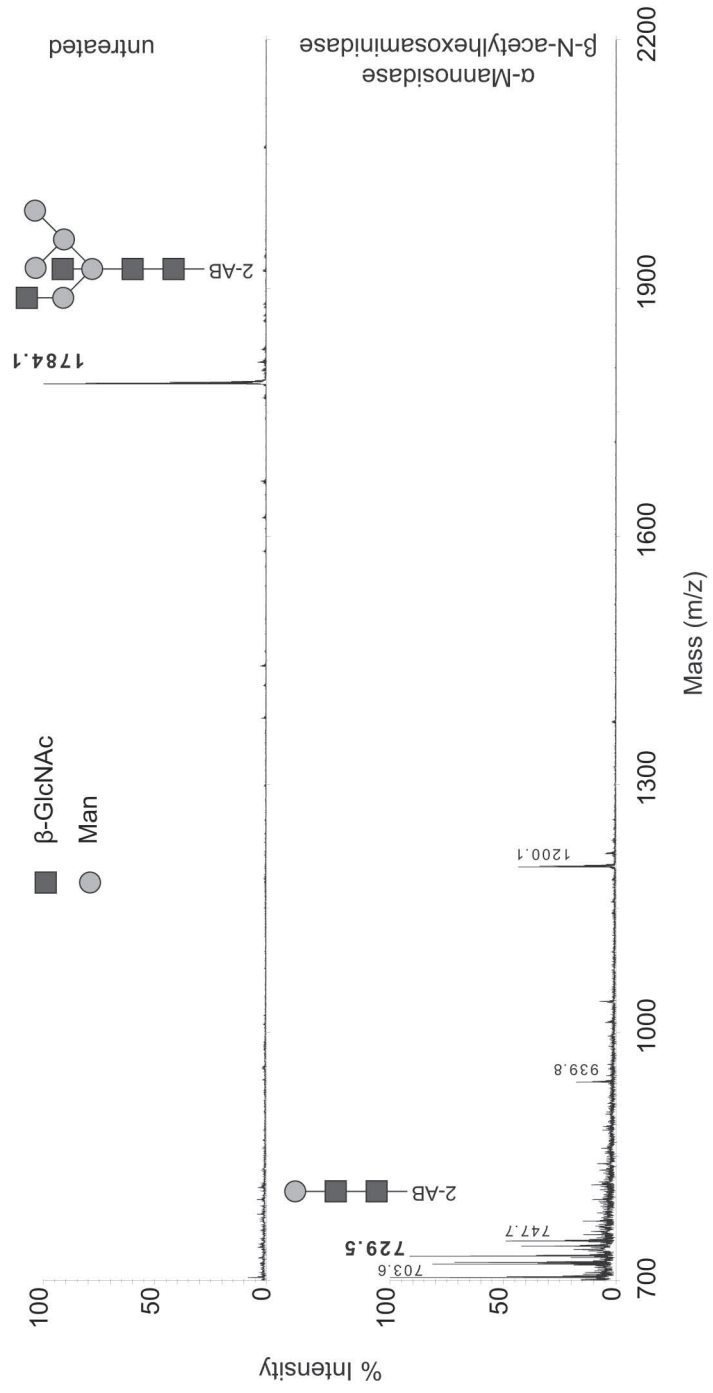

Supplement: supp_M109.076075_jbc.M109.076075-1.pdf [file supp_M109.076075_jbc.M109.076075-1.pdf]
